# Supplementary material for: Theoretical investigations of positron affinities and their structure-dependent properties of carbon dioxide clusters (CO2)n (n = 1–5)
Source: Royal Society of Chemistry journal article supplement (doi:10.1039/d2cp03788b), 2022-11-29
Supplement: d2cp03788b1.pdf [file d2cp03788b1.pdf]

Supporting information for:

Theoretical investigations of positron affinities and their structure-  
dependent properties of carbon dioxide clusters  $(\text{CO}_2)_n$  ( $n = 1 - 5$ )

Miku Furushima<sup>a</sup>, Makito Takagi<sup>a</sup>, Daisuke Yoshida<sup>a,b</sup>, Yukiomi Kita<sup>a</sup>, Tomomi Shimazaki<sup>a</sup>,  
Masanori Tachikawa<sup>a</sup>

<sup>a</sup>Quantum Chemistry Division, Yokohama City University, Seto 22-2, Kanazawa-ku, Yokohama 236-  
0027, Kanagawa, Japan

<sup>b</sup>Nishina Center for Accelerator-Based Science, RIKEN, Hirosawa 2-1, Wako 351-0198, Japan

Contents:

- S1. All the obtained cluster structures.
- S2. Cartesian coordinates of all the obtained cluster structures.
- S3. Table of all the properties.
- S4. The result of regression analysis with  $\mu$  and  $\alpha$  ( $\mu$ - $\alpha$  model).
- S5. Discussion on the standardized regression analyses.

## S1. All the obtained cluster structures.

All the structures are shown below.

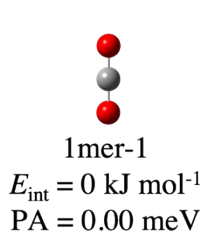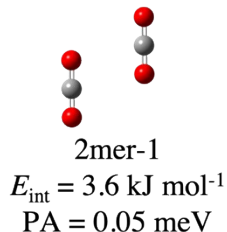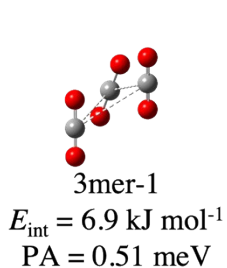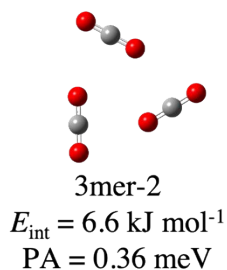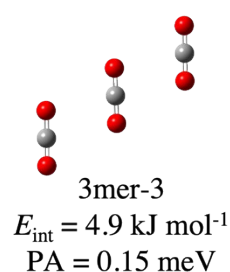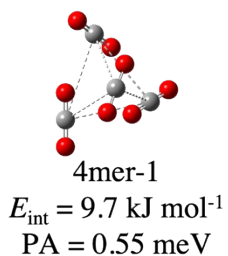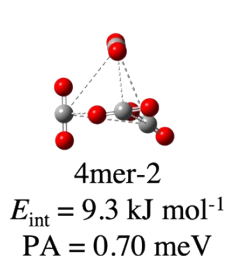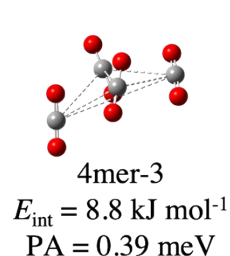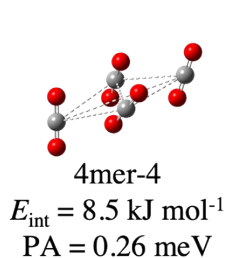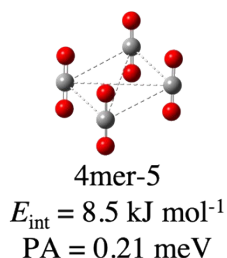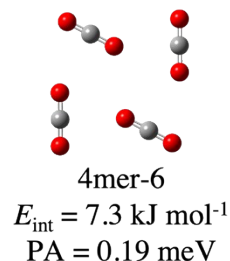

**Fig. S1.** The obtained  $(\text{CO}_2)_n$  structures. The name, interaction energy per molecule  $E_{\text{int}}$ , and PA are shown in the labels. For the three-dimensional structures, dot lines are also shown between carbon atoms.

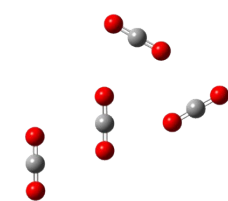

4mer-7  
 $E_{\text{int}} = 6.9 \text{ kJ mol}^{-1}$   
PA = 0.61 meV

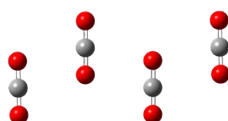

4mer-8  
 $E_{\text{int}} = 5.7 \text{ kJ mol}^{-1}$   
PA = 0.02 meV

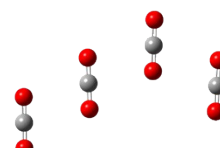

4mer-9  
 $E_{\text{int}} = 5.7 \text{ kJ mol}^{-1}$   
PA = 0.54 meV

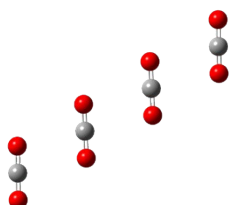

4mer-10  
 $E_{\text{int}} = 5.6 \text{ kJ mol}^{-1}$   
PA = 0.16 meV

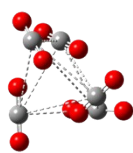

5mer-1  
 $E_{\text{int}} = 11.8 \text{ kJ mol}^{-1}$   
PA = 0.89 meV

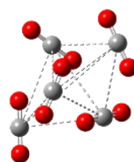

5mer-2  
 $E_{\text{int}} = 11.8 \text{ kJ mol}^{-1}$   
PA = 0.49 meV

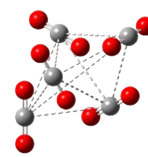

5mer-3  
 $E_{\text{int}} = 11.6 \text{ kJ mol}^{-1}$   
PA = 0.43 meV

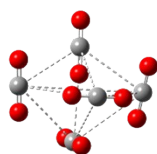

5mer-4  
 $E_{\text{int}} = 11.1 \text{ kJ mol}^{-1}$   
PA = 0.68 meV

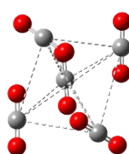

5mer-5  
 $E_{\text{int}} = 11.0 \text{ kJ mol}^{-1}$   
PA = 0.61 meV

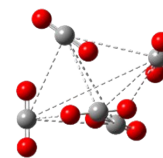

5mer-6  
 $E_{\text{int}} = 11.0 \text{ kJ mol}^{-1}$   
PA = 0.65 meV

Fig. S1. Continued.

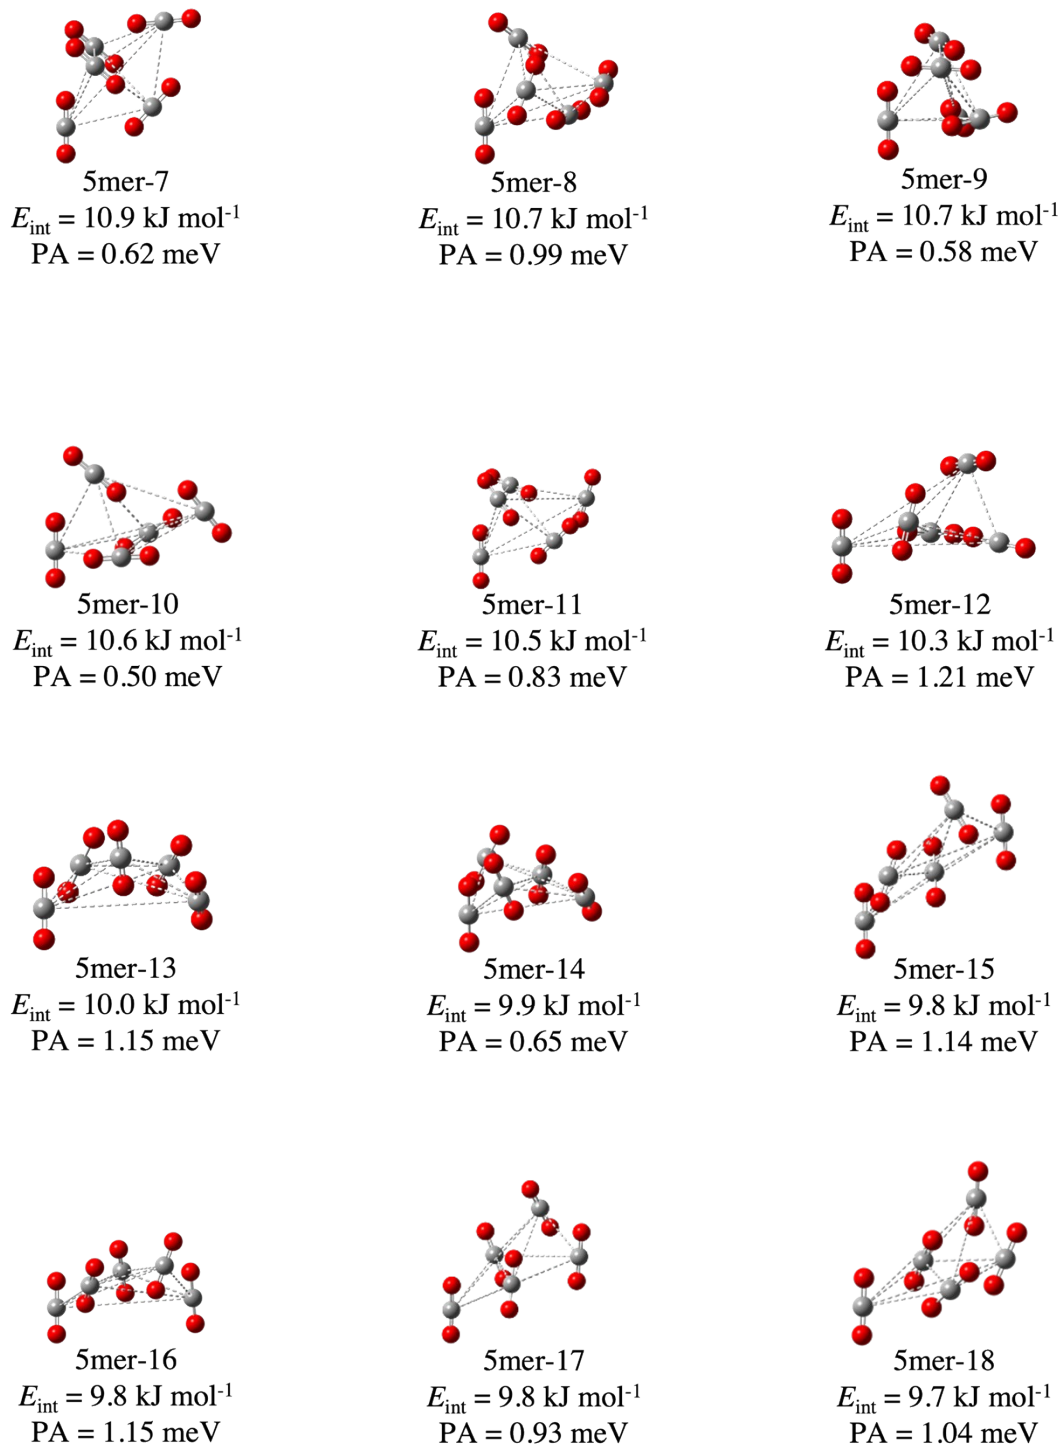

Fig. S1. Continued.

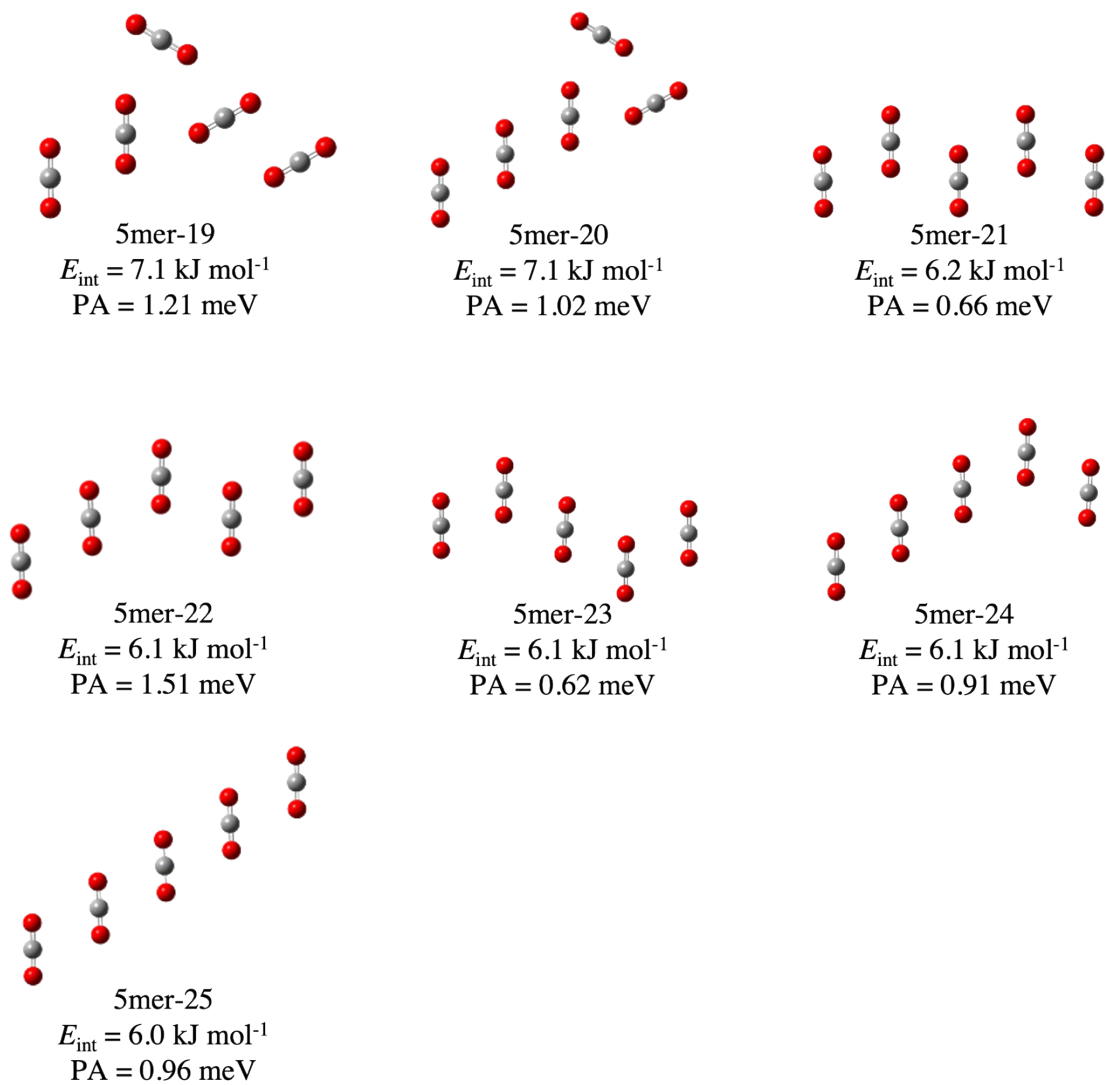

**Fig. S1.** Continued.

## S2. Cartesian coordinates of all the obtained cluster structures.

**Table S1.** Cartesian coordinates of every CO<sub>2</sub> molecule/cluster in units of Å.

1mer-1

|   |           |          |          |
|---|-----------|----------|----------|
| C | 0.000000  | 0.000000 | 0.000000 |
| O | 1.180223  | 0.000000 | 0.000000 |
| O | -1.180223 | 0.000000 | 0.000000 |

2mer-1

|   |           |           |           |
|---|-----------|-----------|-----------|
| C | 1.710572  | 0.288876  | 0.000001  |
| O | 0.959910  | 1.201333  | 0.000001  |
| O | 2.462626  | -0.618762 | 0.000001  |
| C | -1.710572 | -0.288876 | -0.000001 |
| O | -2.462626 | 0.618762  | -0.000001 |
| O | -0.959910 | -1.201333 | -0.000001 |

3mer-1

|   |           |           |           |
|---|-----------|-----------|-----------|
| C | -0.000008 | 1.909065  | 0.000005  |
| O | -1.073530 | 1.908291  | -0.490045 |
| O | 1.073514  | 1.908290  | 0.490055  |
| C | 1.737425  | -0.952875 | -0.387995 |
| O | 0.925255  | -0.719364 | -1.215269 |
| O | 2.547353  | -1.190154 | 0.433361  |
| C | -1.737418 | -0.952886 | 0.387990  |
| O | -2.547309 | -1.190183 | -0.433396 |
| O | -0.925283 | -0.719357 | 1.215293  |

3mer-2

|   |           |           |           |
|---|-----------|-----------|-----------|
| C | -0.487955 | 2.252740  | 0.000045  |
| O | 0.243214  | 3.176935  | 0.000057  |
| O | -1.230649 | 1.334614  | 0.000033  |
| C | -1.706953 | -1.548952 | -0.000010 |
| O | -2.872913 | -1.377838 | -0.000023 |
| O | -0.540486 | -1.733079 | 0.000003  |
| C | 2.194909  | -0.703789 | -0.000035 |
| O | 2.629699  | -1.799097 | -0.000054 |
| O | 1.771134  | 0.398466  | -0.000016 |

### 3mer-3

|   |           |           |          |
|---|-----------|-----------|----------|
| C | 0.000000  | 0.000007  | 0.000000 |
| O | 0.556939  | 1.040327  | 0.000000 |
| O | -0.556940 | -1.040313 | 0.000000 |
| C | -3.467720 | -0.062723 | 0.000000 |
| O | -4.053153 | -1.085740 | 0.000000 |
| O | -2.884098 | 0.964683  | 0.000000 |
| C | 3.467720  | 0.062716  | 0.000000 |
| O | 2.884087  | -0.964682 | 0.000000 |
| O | 4.053165  | 1.085726  | 0.000000 |

### 4mer-1

|   |           |           |           |
|---|-----------|-----------|-----------|
| C | -0.906734 | 2.217580  | 0.010991  |
| O | 1.912284  | -0.244714 | 1.863204  |
| O | -0.393189 | -0.746192 | 1.897129  |
| C | 1.923599  | -0.224698 | -1.266804 |
| O | -1.984304 | -0.355186 | -0.830775 |
| O | -1.579054 | -2.642300 | -0.418629 |
| C | -1.776402 | -1.498750 | -0.621844 |

|   |           |           |           |
|---|-----------|-----------|-----------|
| O | 0.175165  | 1.743863  | 0.059117  |
| O | -1.978533 | 2.702940  | -0.032446 |
| C | 0.759867  | -0.495336 | 1.878019  |
| O | 1.078862  | -1.020437 | -1.042420 |
| O | 2.768521  | 0.562929  | -1.495452 |

#### 4mer-2

|   |           |           |           |
|---|-----------|-----------|-----------|
| C | 0.805334  | -1.170430 | -1.817459 |
| O | 1.381902  | 1.647992  | 0.781432  |
| O | 0.200420  | 2.688071  | -0.975852 |
| C | 0.789574  | -0.989547 | 1.927693  |
| O | -1.203781 | -0.002257 | -0.005313 |
| O | -3.563307 | -0.004845 | -0.012179 |
| C | -2.385934 | -0.003554 | -0.008751 |
| O | 1.395141  | -0.148470 | -1.808159 |
| O | 0.212365  | -2.189505 | -1.838832 |
| C | 0.792797  | 2.163534  | -0.101475 |
| O | 0.189843  | -0.498099 | 2.816168  |
| O | 1.386089  | -1.492891 | 1.042729  |

#### 4mer-3

|   |           |           |           |
|---|-----------|-----------|-----------|
| C | -0.120567 | -1.420599 | 0.968413  |
| O | 3.142307  | 0.573089  | -0.177582 |
| O | 2.319040  | -1.518562 | -0.896923 |
| C | 0.260800  | 1.798663  | -0.155374 |
| O | -2.388465 | 0.579228  | 0.689816  |
| O | -3.351420 | -0.390129 | -1.234809 |
| C | -2.869405 | 0.091534  | -0.274378 |
| O | 0.596762  | -0.720602 | 1.593357  |



|   |           |           |           |
|---|-----------|-----------|-----------|
| O | -0.839213 | -2.116244 | 0.344268  |
| C | 2.731685  | -0.472776 | -0.537928 |
| O | 0.138927  | 0.956844  | -0.978391 |
| O | 0.380178  | 2.638760  | 0.659715  |

4mer-4

|   |           |           |           |
|---|-----------|-----------|-----------|
| C | -0.383180 | 1.727641  | 0.002922  |
| O | 3.670814  | 0.336283  | -0.902603 |
| O | 2.667560  | -0.055669 | 1.197198  |
| C | 0.245732  | -1.547380 | 0.251020  |
| O | -2.212215 | -0.290945 | -1.251220 |
| O | -3.847087 | -0.350270 | 0.450141  |
| C | -3.030212 | -0.319400 | -0.397508 |
| O | 0.573688  | 1.356894  | -0.580986 |
| O | -1.339790 | 2.097413  | 0.584781  |
| C | 3.167682  | 0.140646  | 0.144559  |
| O | -0.470291 | -1.148033 | 1.101524  |
| O | 0.957305  | -1.946803 | -0.599580 |

4mer-5

|   |           |           |           |
|---|-----------|-----------|-----------|
| C | 0.002716  | -2.134484 | 0.403770  |
| O | -0.003915 | 3.114485  | 0.206561  |
| O | -0.001512 | 1.140679  | -1.087425 |
| C | 2.600596  | 0.005859  | 0.016376  |
| O | -2.611067 | -1.029937 | -0.559711 |
| O | -2.593326 | 1.029970  | 0.592170  |
| C | -2.600600 | -0.000071 | 0.016349  |
| O | 0.001445  | -1.165975 | 1.083448  |
| O | 0.003991  | -3.101051 | -0.267755 |

|   |           |           |           |
|---|-----------|-----------|-----------|
| C | -0.002712 | 2.128600  | -0.436229 |
| O | 2.613872  | -1.024055 | -0.559552 |
| O | 2.590512  | 1.035955  | 0.592065  |

---

#### 4mer-6

|   |           |           |           |
|---|-----------|-----------|-----------|
| C | 0.038010  | 2.508762  | -0.013745 |
| O | 2.489445  | -1.041335 | 0.007942  |
| O | 3.731455  | 0.964467  | 0.019914  |
| C | -0.038009 | -2.508756 | -0.013968 |
| O | -2.489441 | 1.041323  | 0.007325  |
| O | -3.731461 | -0.964466 | 0.020430  |
| C | -3.105114 | 0.034382  | 0.013838  |
| O | -0.550386 | 3.530055  | -0.018759 |
| O | 0.634325  | 1.489673  | -0.008826 |
| C | 3.105113  | -0.034388 | 0.013890  |
| O | -0.634354 | -1.489685 | -0.009258 |
| O | 0.550416  | -3.530032 | -0.018781 |

---

#### 4mer-7

|   |           |           |           |
|---|-----------|-----------|-----------|
| C | 2.439621  | 2.049455  | 0.000079  |
| O | 1.549949  | -1.835721 | -0.001279 |
| O | 3.900084  | -2.043251 | 0.001740  |
| C | -0.857983 | -0.200295 | -0.001330 |
| O | -3.642414 | 1.060264  | 0.001716  |
| O | -4.976140 | -0.887045 | 0.000330  |
| C | -4.308322 | 0.084262  | 0.001019  |
| O | 1.947341  | 3.120075  | -0.001154 |
| O | 2.944167  | 0.981654  | 0.001313  |
| C | 2.726861  | -1.933231 | 0.000235  |

|   |           |           |           |
|---|-----------|-----------|-----------|
| O | -1.532582 | -1.168153 | -0.002066 |
| O | -0.190539 | 0.772034  | -0.000603 |

---

#### 4mer-8

|   |           |           |           |
|---|-----------|-----------|-----------|
| C | -4.551596 | -0.262465 | 0.000191  |
| O | -1.189267 | 2.235171  | -0.000388 |
| O | -1.524285 | -0.101123 | -0.000133 |
| C | 1.356474  | -1.069534 | -0.000056 |
| O | 4.415442  | -0.911588 | -0.000232 |
| O | 4.691136  | 1.432519  | 0.000481  |
| C | 4.551722  | 0.262110  | 0.000123  |
| O | -4.690677 | -1.432920 | 0.000137  |
| O | -4.415650 | 0.911278  | 0.000244  |
| C | -1.356600 | 1.069889  | -0.000259 |
| O | 1.524273  | 0.101461  | -0.000060 |
| O | 1.189028  | -2.234798 | -0.000049 |

---

#### 4mer-9

|   |           |           |           |
|---|-----------|-----------|-----------|
| C | 4.240697  | -1.261795 | 0.000167  |
| O | -1.695572 | -0.701854 | -0.000329 |
| O | -1.140014 | 1.591868  | -0.000149 |
| C | -4.755375 | -0.498248 | 0.000202  |
| O | 1.580780  | 0.185629  | -0.000180 |
| O | 2.282689  | 2.439022  | -0.000081 |
| C | 1.932823  | 1.315001  | -0.000129 |
| O | 3.859312  | -2.377064 | 0.000028  |
| O | 4.626356  | -0.144897 | 0.000306  |
| C | -1.418061 | 0.445034  | -0.000237 |
| O | -5.058809 | -1.637187 | -0.000232 |

|   |           |          |          |
|---|-----------|----------|----------|
| O | -4.454805 | 0.644491 | 0.000635 |
|---|-----------|----------|----------|

---

---

4mer-10

|   |           |           |           |
|---|-----------|-----------|-----------|
| C | 5.198266  | -0.161422 | 0.000108  |
| O | 1.121510  | -1.047636 | -0.000227 |
| O | 2.340171  | 0.973415  | 0.000084  |
| C | -1.731070 | 0.038019  | -0.000177 |
| O | -4.556408 | 1.152658  | 0.000020  |
| O | -5.841659 | -0.826987 | 0.000261  |
| C | -5.198298 | 0.160607  | 0.000139  |
| O | 4.555700  | -1.153041 | 0.000356  |
| O | 5.842300  | 0.825738  | -0.000143 |
| C | 1.731104  | -0.037204 | -0.000069 |
| O | -2.339864 | -0.972762 | -0.000382 |
| O | -1.121752 | 1.048614  | 0.000029  |

---

---

5mer-1

|   |           |           |           |
|---|-----------|-----------|-----------|
| C | 0.183475  | -1.204518 | 2.023275  |
| O | -0.678955 | -1.298364 | 1.221006  |
| O | 1.036562  | -1.119588 | 2.830090  |
| C | 2.605454  | -0.307302 | -0.656334 |
| O | 3.028088  | 0.677036  | -1.148308 |
| O | 2.182178  | -1.297745 | -0.171815 |
| C | 0.476429  | 2.232467  | 0.182123  |
| O | 0.847408  | 1.415145  | 0.951058  |
| O | 0.115055  | 3.050440  | -0.583427 |
| C | -2.738719 | 0.477652  | 0.146356  |
| O | -3.192707 | -0.431667 | -0.452582 |
| O | -2.287825 | 1.390454  | 0.742723  |

---

---

|   |           |           |           |
|---|-----------|-----------|-----------|
| C | -0.527621 | -1.196855 | -1.690942 |
| O | -0.758158 | -2.344004 | -1.812179 |
| O | -0.290911 | -0.042791 | -1.579925 |

---

#### 5mer-2

|   |           |           |           |
|---|-----------|-----------|-----------|
| C | 2.837515  | 0.223970  | 0.606590  |
| O | 2.355631  | 1.254022  | 0.921971  |
| O | 3.324425  | -0.803121 | 0.292419  |
| C | -0.068985 | 2.273924  | -0.397925 |
| O | -0.754333 | 1.620219  | 0.308921  |
| O | 0.601832  | 2.934248  | -1.104807 |
| C | -0.632693 | -0.853785 | 1.870283  |
| O | 0.406971  | -1.147626 | 1.394660  |
| O | -1.670896 | -0.568393 | 2.349788  |
| C | 0.762888  | -1.399266 | -1.542526 |
| O | 0.872407  | -0.222677 | -1.574536 |
| O | 0.659344  | -2.571441 | -1.518347 |
| C | -2.897524 | -0.244363 | -0.533150 |
| O | -3.758243 | 0.537939  | -0.349679 |
| O | -2.038039 | -1.033530 | -0.722845 |

---

#### 5mer-3

|   |           |           |           |
|---|-----------|-----------|-----------|
| C | -3.095247 | -0.123804 | -0.005506 |
| O | -2.392344 | 0.811109  | -0.176911 |
| O | -3.805326 | -1.046028 | 0.171487  |
| C | 0.115748  | 1.829580  | -1.283312 |
| O | 0.605078  | 0.792914  | -0.992821 |
| O | -0.362611 | 2.863837  | -1.576509 |
| C | 0.074349  | -2.064968 | -0.802865 |

|   |           |           |           |
|---|-----------|-----------|-----------|
| O | -1.052121 | -1.894532 | -1.109721 |
| O | 1.200405  | -2.243739 | -0.503435 |
| C | -0.214371 | 0.500969  | 1.855955  |
| O | 0.006607  | 1.654386  | 1.956211  |
| O | -0.450293 | -0.651639 | 1.757001  |
| C | 3.121037  | -0.145808 | 0.235037  |
| O | 3.659991  | -0.244056 | -0.808516 |
| O | 2.589477  | -0.039225 | 1.283733  |

5mer-4

|   |           |           |           |
|---|-----------|-----------|-----------|
| C | -2.858826 | 0.134356  | -0.281719 |
| O | -2.996472 | 1.298391  | -0.141071 |
| O | -2.722197 | -1.026944 | -0.433345 |
| C | -0.000056 | 0.002416  | 2.179930  |
| O | 1.179504  | 0.010639  | 2.181571  |
| O | -1.179617 | 0.010505  | 2.181697  |
| C | 0.000023  | 1.943291  | -0.851291 |
| O | -0.000037 | 0.773275  | -0.669567 |
| O | 0.000081  | 3.104934  | -1.034155 |
| C | 0.000040  | -2.218340 | -0.758586 |
| O | -0.000030 | -2.293784 | 0.419086  |
| O | 0.000109  | -2.145507 | -1.935051 |
| C | 2.858821  | 0.134350  | -0.281613 |
| O | 2.996410  | 1.298395  | -0.140991 |
| O | 2.722248  | -1.026960 | -0.433215 |

5mer-5

|   |          |          |           |
|---|----------|----------|-----------|
| C | 2.397385 | 1.520163 | -0.071678 |
| O | 1.313368 | 1.980472 | 0.025129  |

|   |           |           |           |
|---|-----------|-----------|-----------|
| O | 3.482211  | 1.070071  | -0.159825 |
| C | 0.000287  | 0.000648  | 1.802626  |
| O | -1.044497 | 0.549031  | 1.805762  |
| O | 1.045081  | -0.547723 | 1.805422  |
| C | 1.496608  | -1.964313 | -0.832342 |
| O | 1.309475  | -0.893467 | -1.294672 |
| O | 1.685904  | -3.033630 | -0.375071 |
| C | -1.497062 | 1.964270  | -0.832293 |
| O | -1.309997 | 0.893165  | -1.294036 |
| O | -1.686299 | 3.033839  | -0.375599 |
| C | -2.397218 | -1.520766 | -0.071092 |
| O | -3.482464 | -1.071807 | -0.159983 |
| O | -1.312782 | -1.979952 | 0.026457  |

5mer-6

|   |           |           |           |
|---|-----------|-----------|-----------|
| C | 3.005969  | -0.360130 | -0.128422 |
| O | 2.635723  | 0.595847  | -0.713782 |
| O | 3.386975  | -1.314301 | 0.448867  |
| C | 0.340238  | 2.379323  | -0.886607 |
| O | -0.355672 | 1.546443  | -0.419069 |
| O | 1.022589  | 3.216962  | -1.354947 |
| C | -0.000013 | -0.000722 | 2.032218  |
| O | 1.139484  | 0.303385  | 2.039141  |
| O | -1.139509 | -0.304845 | 2.038769  |
| C | -0.340394 | -2.378976 | -0.887287 |
| O | -1.023096 | -3.216611 | -1.355118 |
| O | 0.355858  | -1.546101 | -0.420251 |
| C | -3.005799 | 0.360507  | -0.128352 |
| O | -3.386489 | 1.314227  | 0.449890  |
| O | -2.635863 | -0.595009 | -0.714664 |

## 5mer-7

|   |           |           |           |
|---|-----------|-----------|-----------|
| C | 3.154062  | 0.037323  | -0.000153 |
| O | 2.287558  | -0.766704 | 0.000055  |
| O | 4.028043  | 0.826285  | -0.000360 |
| C | -0.000114 | -1.140659 | -1.798553 |
| O | -0.000068 | 0.032657  | -1.939389 |
| O | -0.000162 | -2.310656 | -1.663451 |
| C | -0.000021 | 2.210090  | -0.000096 |
| O | 1.179342  | 2.216578  | -0.000210 |
| O | -1.179384 | 2.216620  | 0.000016  |
| C | 0.000154  | -1.140261 | 1.798812  |
| O | 0.000112  | -2.310243 | 1.663586  |
| O | 0.000197  | 0.033039  | 1.939766  |
| C | -3.154082 | 0.037317  | -0.000007 |
| O | -4.028181 | 0.826149  | -0.000327 |
| O | -2.287457 | -0.766581 | 0.000313  |

## 5mer-8

|   |           |           |           |
|---|-----------|-----------|-----------|
| C | -0.618612 | 0.169593  | 2.081161  |
| O | -0.319479 | -0.654665 | 1.286660  |
| O | -0.917326 | 0.976262  | 2.883623  |
| C | 2.602482  | -0.893858 | 0.618910  |
| O | 2.413013  | -0.013706 | -0.147082 |
| O | 2.795941  | -1.767512 | 1.384663  |
| C | 0.774537  | 2.372278  | -0.783080 |
| O | 0.189645  | 2.190256  | 0.226466  |
| O | 1.358504  | 2.566035  | -1.787874 |
| C | -2.886243 | -0.460880 | -0.318466 |
| O | -2.844745 | -1.547780 | -0.776349 |
| O | -2.927282 | 0.623110  | 0.146698  |



|   |           |           |           |
|---|-----------|-----------|-----------|
| C | 0.126032  | -1.187154 | -1.605339 |
| O | 0.578897  | -2.246010 | -1.354086 |
| O | -0.325816 | -0.125973 | -1.857607 |

---

#### 5mer-9

|   |           |           |           |
|---|-----------|-----------|-----------|
| C | -3.233908 | 0.014221  | 0.019989  |
| O | -3.347867 | 1.189324  | 0.044468  |
| O | -3.126182 | -1.159651 | -0.005619 |
| C | 0.574078  | -1.968997 | -1.180846 |
| O | 0.001814  | -2.112606 | -0.159033 |
| O | 1.152947  | -1.834837 | -2.199658 |
| C | 0.023200  | -0.330623 | 2.130277  |
| O | -0.793492 | 0.330300  | 1.591759  |
| O | 0.839855  | -0.979434 | 2.678492  |
| C | -0.470452 | 1.652964  | -1.028961 |
| O | -0.748304 | 0.618984  | -1.527698 |
| O | -0.188300 | 2.686943  | -0.540156 |
| C | 3.107198  | 0.631435  | 0.059079  |
| O | 4.253403  | 0.897242  | 0.097934  |
| O | 1.956039  | 0.364485  | 0.019858  |

---

#### 5mer-10

|   |           |           |           |
|---|-----------|-----------|-----------|
| C | 3.538918  | 0.196987  | 0.215097  |
| O | 3.037994  | 1.258816  | 0.334621  |
| O | 4.045707  | -0.861784 | 0.098515  |
| C | -0.854595 | 2.355972  | -0.080509 |
| O | -0.098676 | 1.448129  | -0.109720 |
| O | -1.596514 | 3.269818  | -0.050272 |
| C | -0.006111 | -0.857548 | 1.660148  |

|   |           |           |           |
|---|-----------|-----------|-----------|
| O | 1.115890  | -1.051493 | 1.349530  |
| O | -1.127276 | -0.668667 | 1.972482  |
| C | -3.200478 | -0.737726 | -0.185331 |
| O | -3.012246 | 0.409743  | -0.391407 |
| O | -3.397751 | -1.881317 | 0.018306  |
| C | 0.518590  | -0.958324 | -1.610210 |
| O | -0.542349 | -1.370695 | -1.294357 |
| O | 1.577977  | -0.552071 | -1.927094 |

#### 5mer-11

|   |           |           |           |
|---|-----------|-----------|-----------|
| C | 3.343247  | -0.144221 | -0.500324 |
| O | 2.853850  | -0.978235 | -1.178983 |
| O | 3.835708  | 0.689805  | 0.171204  |
| C | -2.608835 | -1.073714 | -1.065702 |
| O | -2.254648 | 0.030190  | -0.834839 |
| O | -2.974349 | -2.167591 | -1.301546 |
| C | 0.081843  | 1.772507  | -1.070410 |
| O | 0.630703  | 1.035564  | -0.325818 |
| O | -0.456566 | 2.508956  | -1.813759 |
| C | 0.686119  | -1.680919 | 0.848541  |
| O | -0.139384 | -2.067610 | 0.099959  |
| O | 1.514465  | -1.300772 | 1.596964  |
| C | -1.503989 | 1.125096  | 1.790971  |
| O | -1.328003 | 0.026301  | 2.183507  |
| O | -1.680565 | 2.224329  | 1.401006  |

#### 5mer-12

|   |           |           |           |
|---|-----------|-----------|-----------|
| C | -3.666022 | -0.141870 | -0.012984 |
| O | -3.999173 | 0.180003  | -1.097008 |

|   |           |           |           |
|---|-----------|-----------|-----------|
| O | -3.339054 | -0.465556 | 1.074642  |
| C | 2.539619  | -0.691325 | -1.504270 |
| O | 1.540249  | -0.258535 | -1.043564 |
| O | 3.533413  | -1.122596 | -1.964753 |
| C | -0.666947 | -1.645758 | 0.348578  |
| O | -1.212036 | -1.893483 | -0.668048 |
| O | -0.115186 | -1.407886 | 1.363263  |
| C | 2.075581  | 0.497066  | 1.790639  |
| O | 2.886698  | -0.359834 | 1.781055  |
| O | 1.274321  | 1.362628  | 1.796433  |
| C | -0.281739 | 1.982088  | -0.619368 |
| O | -1.103567 | 1.217308  | -0.254827 |
| O | 0.533964  | 2.747801  | -0.989137 |

#### 5mer-13

|   |           |           |           |
|---|-----------|-----------|-----------|
| C | -0.119953 | -1.039584 | 1.117128  |
| O | -0.085823 | -0.768245 | -0.035716 |
| O | -0.153038 | -1.311739 | 2.260088  |
| C | 2.967727  | -1.297483 | -0.565607 |
| O | 2.869613  | -1.085934 | 0.593926  |
| O | 3.065556  | -1.512923 | -1.719169 |
| C | 1.713936  | 1.724377  | 0.261094  |
| O | 1.116365  | 1.758158  | 1.279529  |
| O | 2.310573  | 1.685998  | -0.754909 |
| C | -2.932824 | -1.199186 | -0.760859 |
| O | -2.968736 | -1.932507 | 0.163013  |
| O | -2.895274 | -0.464649 | -1.683664 |
| C | -1.630674 | 1.815642  | -0.052990 |
| O | -2.226717 | 1.296930  | 0.824856  |
| O | -1.031177 | 2.332086  | -0.927030 |

## 5mer-14

|   |           |           |           |
|---|-----------|-----------|-----------|
| C | 1.605340  | 1.632243  | 0.743070  |
| O | 1.743542  | 1.884770  | 1.883843  |
| O | 1.465628  | 1.382771  | -0.405635 |
| C | 3.289623  | -0.982644 | -0.587599 |
| O | 2.683607  | -1.494092 | -1.461716 |
| O | 3.892729  | -0.470918 | 0.287951  |
| C | -0.000021 | -1.304043 | 0.000247  |
| O | -0.702154 | -1.301490 | -0.948117 |
| O | 0.702115  | -1.300781 | 0.948608  |
| C | -1.605092 | 1.632330  | -0.742987 |
| O | -1.465111 | 1.382497  | 0.405598  |
| O | -1.743560 | 1.885215  | -1.883639 |
| C | -3.289851 | -0.982427 | 0.587267  |
| O | -2.684291 | -1.494001 | 1.461627  |
| O | -3.892504 | -0.470565 | -0.288518 |

## 5mer-15

|   |           |           |           |
|---|-----------|-----------|-----------|
| C | 3.543347  | -0.991050 | 0.541717  |
| O | 4.281552  | -1.512428 | -0.213110 |
| O | 2.803014  | -0.469803 | 1.302817  |
| C | -2.092856 | 1.719935  | -0.027526 |
| O | -1.897845 | 1.034422  | -0.971532 |
| O | -2.290035 | 2.404162  | 0.909738  |
| C | 1.825644  | 1.736206  | -0.477419 |
| O | 2.810473  | 1.545898  | -1.097330 |
| O | 0.840533  | 1.925989  | 0.144986  |
| C | -3.289923 | -1.476567 | -0.206007 |
| O | -3.951331 | -0.807195 | 0.505658  |
| O | -2.627563 | -2.146456 | -0.916926 |

|   |           |           |           |
|---|-----------|-----------|-----------|
| C | 0.013806  | -0.987936 | 0.167478  |
| O | 0.689698  | -1.119536 | -0.790838 |
| O | -0.658507 | -0.855493 | 1.127854  |

---

#### 5mer-16

|   |           |           |           |
|---|-----------|-----------|-----------|
| C | 3.438917  | -0.918554 | 0.099864  |
| O | 3.196397  | -0.425912 | 1.146365  |
| O | 3.684766  | -1.411955 | -0.941332 |
| C | -2.230776 | 1.474951  | -0.175688 |
| O | -1.580064 | 0.904151  | -0.982971 |
| O | -2.880696 | 2.043440  | 0.623552  |
| C | 1.091746  | 2.123064  | -0.683512 |
| O | 1.629691  | 1.126614  | -1.018166 |
| O | 0.553870  | 3.117470  | -0.349286 |
| C | -2.511572 | -2.084373 | -0.274001 |
| O | -2.697716 | -1.399136 | 0.671890  |
| O | -2.331140 | -2.767050 | -1.216374 |
| C | 0.214359  | -0.594937 | 1.035264  |
| O | 0.016316  | 0.403828  | 1.631478  |
| O | 0.406572  | -1.591564 | 0.433398  |

---

#### 5mer-17

|   |           |           |           |
|---|-----------|-----------|-----------|
| C | -3.679615 | -0.195108 | -0.357316 |
| O | -4.435273 | -0.793024 | 0.319424  |
| O | -2.924052 | 0.408478  | -1.038435 |
| C | -0.905712 | 1.694101  | 0.798577  |
| O | -1.246223 | 0.795596  | 1.485462  |
| O | -0.568980 | 2.590734  | 0.111137  |
| C | -0.491591 | -1.299216 | -0.595267 |

|   |           |           |           |
|---|-----------|-----------|-----------|
| O | -1.267527 | -2.091414 | -0.197506 |
| O | 0.283791  | -0.504677 | -1.000280 |
| C | 2.319992  | 1.560076  | -0.108149 |
| O | 2.023317  | 1.129129  | 0.952663  |
| O | 2.616169  | 1.990277  | -1.162996 |
| C | 2.759517  | -1.760351 | 0.266440  |
| O | 3.581712  | -1.198614 | -0.366487 |
| O | 1.935123  | -2.326111 | 0.893805  |

#### 5mer-18

|   |           |           |           |
|---|-----------|-----------|-----------|
| C | -3.644202 | -1.009298 | -0.210242 |
| O | -4.317737 | -0.813814 | 0.736437  |
| O | -2.972021 | -1.208605 | -1.161574 |
| C | 1.892998  | 1.486021  | 0.733847  |
| O | 0.965204  | 1.403148  | 1.460265  |
| O | 2.818878  | 1.565577  | 0.008452  |
| C | -1.218771 | 2.067881  | -0.459351 |
| O | -2.025892 | 1.439704  | 0.130384  |
| O | -0.411015 | 2.695179  | -1.046214 |
| C | 3.250797  | -1.469236 | -0.183093 |
| O | 2.648230  | -1.449969 | 0.834471  |
| O | 3.851283  | -1.492996 | -1.195784 |
| C | -0.279741 | -1.072165 | 0.118492  |
| O | 0.244777  | -0.570914 | -0.815126 |
| O | -0.802517 | -1.569712 | 1.048947  |

#### 5mer-19

|   |           |          |          |
|---|-----------|----------|----------|
| C | -0.170546 | 3.449637 | 0.000102 |
| O | -1.136515 | 4.124391 | 0.000610 |

|   |           |           |           |
|---|-----------|-----------|-----------|
| O | 0.804671  | 2.783456  | -0.000411 |
| C | -4.990743 | -1.668691 | -0.000135 |
| O | -5.073018 | -2.844535 | -0.000622 |
| O | -4.912546 | -0.489734 | 0.000353  |
| C | -1.873043 | -0.161333 | 0.000276  |
| O | -1.963752 | -1.337511 | -0.000119 |
| O | -1.790211 | 1.015214  | 0.000670  |
| C | 4.941046  | -1.792437 | 0.000544  |
| O | 6.006658  | -1.288590 | -0.000172 |
| O | 3.874659  | -2.301220 | 0.001261  |
| C | 2.093127  | 0.172941  | -0.000781 |
| O | 1.032827  | -0.343525 | -0.000370 |
| O | 3.157346  | 0.681968  | -0.001204 |

5mer-20

|   |           |           |           |
|---|-----------|-----------|-----------|
| C | -3.962684 | 2.063296  | 0.000209  |
| O | -3.453920 | 3.126166  | -0.000083 |
| O | -4.483531 | 1.003331  | 0.000505  |
| C | -4.307293 | -1.914367 | 0.000244  |
| O | -5.481919 | -2.007982 | 0.001076  |
| O | -3.129114 | -1.833322 | -0.000588 |
| C | -0.698451 | -0.235946 | -0.000647 |
| O | -1.351781 | 0.745868  | -0.000463 |
| O | -0.037448 | -1.213218 | -0.000830 |
| C | 6.215954  | 0.123811  | 0.000515  |
| O | 6.861999  | -0.862054 | 0.000678  |
| O | 5.571537  | 1.114191  | 0.000354  |
| C | 2.752199  | -0.036567 | -0.000325 |
| O | 2.124863  | 0.962873  | -0.000226 |
| O | 3.379521  | -1.036023 | -0.000421 |

## 5mer-21

|   |           |           |           |
|---|-----------|-----------|-----------|
| C | 5.968788  | -0.697916 | 0.001930  |
| O | 5.949788  | -1.876447 | 0.001432  |
| O | 5.991307  | 0.483453  | 0.002433  |
| C | 2.979602  | 1.048850  | -0.000535 |
| O | 2.990840  | -0.134048 | -0.001075 |
| O | 2.967868  | 2.226027  | -0.000001 |
| C | -0.000082 | -0.701933 | -0.002756 |
| O | -0.000108 | -1.879152 | -0.003402 |
| O | -0.000056 | 0.481049  | -0.002113 |
| C | -5.968655 | -0.698080 | 0.001963  |
| O | -5.949298 | -1.876610 | 0.001740  |
| O | -5.991534 | 0.483287  | 0.002190  |
| C | -2.979651 | 1.049081  | -0.000600 |
| O | -2.967830 | 2.226255  | -0.000204 |
| O | -2.990976 | -0.133814 | -0.001001 |

## 5mer-22

|   |           |           |           |
|---|-----------|-----------|-----------|
| C | 2.962053  | 0.447147  | 0.000053  |
| O | 3.204475  | -0.707660 | 0.000083  |
| O | 2.718941  | 1.601888  | 0.000023  |
| C | 6.268982  | -0.598232 | -0.000089 |
| O | 6.003646  | 0.553203  | -0.000123 |
| O | 6.537243  | -1.745964 | -0.000054 |
| C | -0.361411 | 1.414271  | 0.000070  |
| O | -0.680775 | 2.547322  | 0.000049  |
| O | -0.040370 | 0.275664  | 0.000090  |
| C | -6.108913 | -0.193118 | -0.000089 |
| O | -6.410649 | 0.946292  | -0.000133 |
| O | -5.809749 | -1.336210 | -0.000045 |



|   |           |           |          |
|---|-----------|-----------|----------|
| C | -2.760829 | -1.070099 | 0.000055 |
| O | -2.435773 | -2.201553 | 0.000086 |
| O | -3.086900 | 0.067042  | 0.000023 |

---

#### 5mer-23

|   |           |           |           |
|---|-----------|-----------|-----------|
| C | 3.175967  | 1.377820  | 0.000530  |
| O | 3.346265  | 2.542632  | 0.001008  |
| O | 3.004403  | 0.207350  | 0.000052  |
| C | 5.856053  | -0.808766 | -0.000536 |
| O | 5.651943  | -1.969638 | -0.001102 |
| O | 6.064123  | 0.354370  | 0.000029  |
| C | 0.000125  | 0.000710  | 0.000101  |
| O | -0.100445 | -1.175018 | -0.000026 |
| O | 0.100695  | 1.176439  | 0.000238  |
| C | -5.856750 | 0.807620  | -0.000450 |
| O | -6.064067 | -0.355657 | 0.000502  |
| O | -5.653388 | 1.968628  | -0.001402 |
| C | -3.175395 | -1.377383 | 0.000351  |
| O | -3.004387 | -0.206829 | -0.000248 |
| O | -3.345144 | -2.542277 | 0.000950  |

---

#### 5mer-24

|   |           |           |           |
|---|-----------|-----------|-----------|
| C | -3.705982 | -1.223171 | 0.000214  |
| O | -4.184025 | -2.298935 | 0.000915  |
| O | -3.225066 | -0.142359 | -0.000496 |
| C | -5.695346 | 1.605782  | 0.000805  |
| O | -5.184507 | 2.668008  | 0.000102  |
| O | -6.210615 | 0.542436  | 0.001511  |
| C | -0.277851 | -0.730116 | -0.001457 |

|   |           |           |           |
|---|-----------|-----------|-----------|
| O | 0.121624  | 0.380254  | -0.002415 |
| O | -0.677247 | -1.840469 | -0.000505 |
| C | 6.549947  | 0.462539  | 0.001380  |
| O | 6.981886  | 1.559207  | 0.000857  |
| O | 6.120327  | -0.638203 | 0.001910  |
| C | 3.129133  | -0.115005 | -0.000940 |
| O | 2.735751  | -1.227597 | -0.000251 |
| O | 3.521946  | 0.997637  | -0.001629 |

5mer-25

|   |           |           |           |
|---|-----------|-----------|-----------|
| C | -3.462095 | 0.042178  | -0.000108 |
| O | -4.063481 | -0.973001 | -0.000849 |
| O | -2.860025 | 1.057121  | 0.000628  |
| C | -6.930624 | 0.139332  | 0.000144  |
| O | -6.295318 | 1.135619  | 0.000955  |
| O | -7.567399 | -0.852518 | -0.000666 |
| C | -0.000007 | 0.000557  | -0.000113 |
| O | 0.597164  | 1.018320  | 0.000261  |
| O | -0.597179 | -1.017206 | -0.000501 |
| C | 6.930648  | -0.140274 | 0.000101  |
| O | 7.567827  | 0.851321  | -0.001106 |
| O | 6.294935  | -1.136307 | 0.001307  |
| C | 3.462080  | -0.041793 | -0.000012 |
| O | 2.859626  | -1.056510 | 0.000717  |
| O | 4.063848  | 0.973159  | -0.000755 |

### S3. Table of all the properties.

**Table S2.** Properties of all the structures. The structure name, positron affinity PA (in meV), dipole moment  $\mu$  (in debye), quadrupole moment  $Q$  (in buckingham), dipole polarizability  $\alpha$  (in bohr<sup>3</sup>), flatness  $F$  (dimension-less), surface area  $S$  (in Å<sup>2</sup>), and interaction energy  $E_{\text{int}}$  (in kJ mol<sup>-1</sup>) are shown from left to right.

| name    | PA   | $\mu$ | $Q$   | $\alpha$ | $F$  | $S$    | $E_{\text{int}}$ |
|---------|------|-------|-------|----------|------|--------|------------------|
| 1mer-1  | 0.00 | 0.00  | 3.27  | 13.93    | 1.00 | 0.00   | 0.00             |
| 2mer-1  | 0.05 | 0.00  | 7.05  | 28.09    | 1.00 | 47.61  | 3.62             |
| 3mer-1  | 0.51 | 0.02  | 9.46  | 42.28    | 0.82 | 117.91 | 6.88             |
| 3mer-2  | 0.36 | 0.00  | 5.43  | 43.34    | 1.00 | 221.51 | 6.61             |
| 3mer-3  | 0.15 | 0.00  | 10.42 | 42.18    | 1.00 | 126.05 | 4.94             |
| 4mer-1  | 0.55 | 0.15  | 7.16  | 57.61    | 0.46 | 54.07  | 9.67             |
| 4mer-2  | 0.70 | 0.35  | 0.92  | 57.77    | 0.12 | 56.20  | 9.26             |
| 4mer-3  | 0.39 | 0.10  | 11.65 | 56.30    | 0.83 | 54.02  | 8.75             |
| 4mer-4  | 0.26 | 0.15  | 11.86 | 56.69    | 0.90 | 54.36  | 8.53             |
| 4mer-5  | 0.21 | 0.01  | 13.43 | 56.50    | 0.90 | 65.42  | 8.53             |
| 4mer-6  | 0.19 | 0.00  | 9.26  | 58.36    | 1.00 | 123.45 | 7.33             |
| 4mer-7  | 0.61 | 0.02  | 7.70  | 57.48    | 1.00 | 136.82 | 6.93             |
| 4mer-8  | 0.02 | 0.00  | 13.75 | 55.90    | 1.00 | 108.75 | 5.72             |
| 4mer-9  | 0.54 | 0.01  | 13.67 | 56.05    | 1.00 | 132.86 | 5.67             |
| 4mer-10 | 0.16 | 0.00  | 5.32  | 56.28    | 1.00 | 65.96  | 5.62             |
| 5mer-1  | 0.89 | 0.08  | 8.18  | 71.68    | 0.45 | 67.83  | 11.78            |
| 5mer-2  | 0.49 | 0.15  | 8.91  | 72.06    | 0.62 | 71.97  | 11.76            |
| 5mer-3  | 0.43 | 0.25  | 4.21  | 72.15    | 0.68 | 74.10  | 11.56            |
| 5mer-4  | 0.68 | 0.23  | 6.07  | 71.52    | 0.58 | 70.35  | 11.11            |
| 5mer-5  | 0.61 | 0.03  | 11.16 | 72.04    | 0.73 | 78.72  | 10.97            |
| 5mer-6  | 0.65 | 0.06  | 5.46  | 73.01    | 0.68 | 88.84  | 10.96            |
| 5mer-7  | 0.62 | 0.03  | 8.29  | 72.03    | 0.70 | 76.54  | 10.87            |
| 5mer-8  | 0.99 | 0.12  | 8.02  | 71.61    | 0.41 | 74.56  | 10.69            |
| 5mer-9  | 0.58 | 0.57  | 3.15  | 72.40    | 0.64 | 79.68  | 10.68            |
| 5mer-10 | 0.50 | 0.22  | 9.43  | 72.58    | 0.78 | 84.75  | 10.60            |
| 5mer-11 | 0.83 | 0.32  | 8.31  | 71.79    | 0.65 | 85.24  | 10.52            |

|         |      |      |       |       |      |        |       |
|---------|------|------|-------|-------|------|--------|-------|
| 5mer-12 | 1.21 | 0.46 | 3.17  | 72.22 | 0.71 | 87.84  | 10.32 |
| 5mer-13 | 1.15 | 0.11 | 13.41 | 70.15 | 0.76 | 83.36  | 10.01 |
| 5mer-14 | 0.65 | 0.05 | 13.30 | 70.26 | 0.81 | 82.91  | 9.94  |
| 5mer-15 | 1.14 | 0.28 | 14.47 | 70.82 | 0.92 | 97.96  | 9.80  |
| 5mer-16 | 1.15 | 0.16 | 14.28 | 70.62 | 0.85 | 98.86  | 9.79  |
| 5mer-17 | 0.93 | 0.21 | 14.57 | 70.59 | 0.90 | 92.73  | 9.77  |
| 5mer-18 | 1.04 | 0.17 | 14.35 | 70.74 | 0.89 | 96.67  | 9.75  |
| 5mer-19 | 1.21 | 0.01 | 9.28  | 71.63 | 1.00 | 308.60 | 7.14  |
| 5mer-20 | 1.02 | 0.02 | 10.54 | 71.60 | 1.00 | 225.70 | 7.08  |
| 5mer-21 | 0.66 | 0.01 | 17.09 | 69.77 | 1.00 | 187.45 | 6.16  |
| 5mer-22 | 1.51 | 0.01 | 17.06 | 69.94 | 1.00 | 191.78 | 6.11  |
| 5mer-23 | 0.62 | 0.00 | 17.02 | 69.90 | 1.00 | 217.23 | 6.11  |
| 5mer-24 | 0.91 | 0.01 | 17.00 | 70.13 | 1.00 | 222.69 | 6.07  |
| 5mer-25 | 0.96 | 0.00 | 17.16 | 70.39 | 1.00 | 105.43 | 6.03  |

---

#### S4. The result of regression analysis with $\mu$ and $\alpha$ ( $\mu$ - $\alpha$ model).

In the section 3.3 in the main paper, we discuss the relation between PA and several electrostatic and structural properties. The result of linear regression analysis for PA with  $\mu$  and  $\alpha$  is summarized here. Determination coefficient  $R^2$  is 0.45, which indicates that it is an insufficient regression model. Akaike information criterion AIC is 17.1 which shows that it is an inadequate model compared with  $\mu$ - $Q$ - $\alpha$  model and  $\mu$ - $Q$ - $\alpha$ -struct model. Obtained regression equation is,

$$PA_{\text{reg}} = -0.51 + 0.10\mu + 0.0183\alpha, \quad (\text{s4.1})$$

where  $PA_{\text{reg}}$  means fitted PA with linear regression analysis.

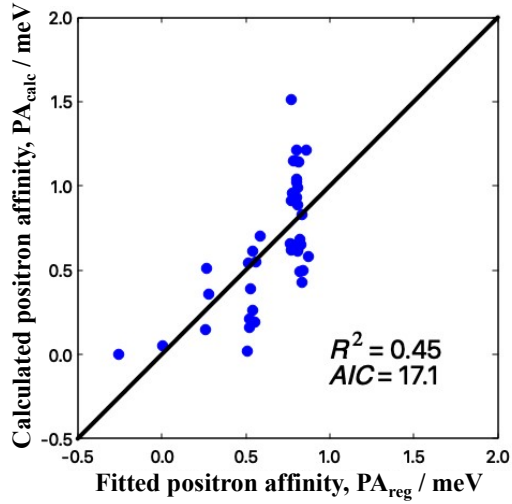

**Fig. S2.** The result of regression analysis to explain PA with the magnitude of permanent dipole moment  $\mu$  and polarizability  $\alpha$ , refer to as  $\mu$ - $\alpha$  model. The horizontal axis shows predicted PA by regression analysis ( $PA_{\text{reg}}$ ) and the vertical axis shows first-principle calculated PA ( $PA_{\text{calc}}$ ). The diagonal line indicates the identical line where  $PA_{\text{calc}} = PA_{\text{reg}}$

## S5. Discussion on the standardized regression analyses.

In this section, the validity of every explanatory variable in the three regression models ( $\mu$ - $\alpha$ ,  $\mu$ - $Q$ - $\alpha$ , and  $\mu$ - $Q$ - $\alpha$ -struct models) are discussed, and thus validities for  $\mu$ - $Q$ - $\alpha$  and  $\mu$ - $Q$ - $\alpha$ -struct models are confirmed.

The validities of the variables can be verified by the following standardization process. Every property  $X$  is standardized as,

$$X^{\text{std}} = \frac{X - \bar{X}}{\sigma(X)}, \quad (\text{s5.1})$$

where,  $X^{\text{std}}$ ,  $\bar{X}$ , and  $\sigma(X)$  indicate the standardized variable of  $X$ , the averaged value of  $X$ , and the standard deviation of  $X$  respectively, and where  $X = \text{PA}, \mu, Q, \alpha, F,$  and  $S$ .

The standardized regression models of  $\mu$ - $\alpha$ ,  $\mu$ - $Q$ - $\alpha$ , and  $\mu$ - $Q$ - $\alpha$ -struct are expressed as,

$$PA_{reg}^{\text{std}} = 0.04\mu^{\text{std}} + 0.66\alpha^{\text{std}}, \quad (\text{s5.2})$$

$$PA_{reg}^{\text{std}} = 0.18\mu^{\text{std}} + 0.23Q^{\text{std}} + 0.54\alpha^{\text{std}}, \quad (\text{s5.3})$$

and,

$$PA_{reg}^{\text{std}} = 0.29\mu^{\text{std}} + 0.34Q^{\text{std}} + 0.30\alpha^{\text{std}} - 0.27F^{\text{std}} + 0.40S^{\text{std}}, \quad (\text{s5.4})$$

respectively, where  $PA_{reg}^{\text{std}}$  is the fitted value for  $\text{PA}^{\text{std}}$ . Generally, the larger values of absolute coefficients, which are to be in the range from 0 to 1, are more meaningful. The absolute coefficients of  $\mu^{\text{std}}$  in  $\mu$ - $\alpha$  model in Eq. (s5.2) is small reflecting the low accuracy of  $\mu$ - $\alpha$  model. In the models of  $\mu$ - $Q$ - $\alpha$  and  $\mu$ - $Q$ - $\alpha$ -struct, absolute values of all the coefficients are large enough indicating every respective validity. Especially, the absolute coefficients of  $F$  and  $S$ , which are added in  $\mu$ - $Q$ - $\alpha$ -struct model, is obviously non-zero indicating the validity of structural parameters.
